# Supplementary material for: Human DDX3X Unwinds Japanese Encephalitis and Zika Viral 5′ Terminal Regions
Source: MDPI journal article supplement (doi:10.3390/ijms22010413), 2021-01-02
Supplement: s1 [file s1]

## Supplementary Materials

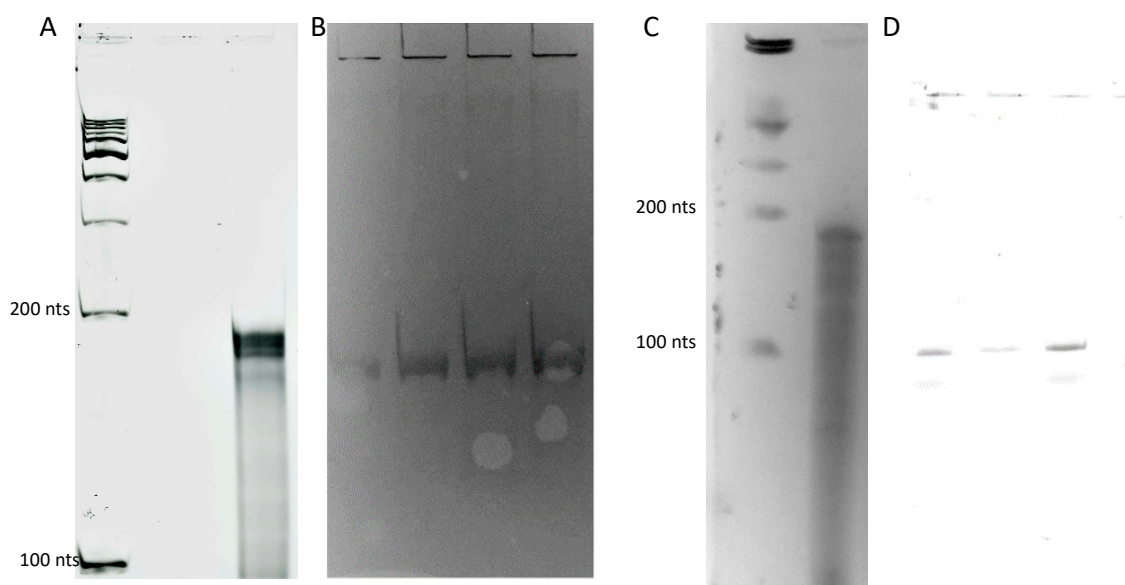

**Supplementary Figure S1.** Urea PAGEs representing Flaviviral RNAs. **(A)** *In vitro* transcribed and **(B)** SEC-purified ZIKA 5' TR, fractions containing a single band were used for downstream experiments (7.2% Urea PAGE ran for 30 min, 300 V in 0.5x TBE running buffer). **(B)** 5' TR ZIKV RNA after IVT and SEC purification. 7.5% Urea-PAGE at 300 V for 30 min in 1x TBE running buffer **(C)** *In vitro* transcribed and **(D)** SEC-purified JEV 5' TR suggesting that the RNA preparation is pure (7.5% Urea-PAGE, 300 V, 20 min, 1x TBE running buffer). Note, that the JEV (159 nts) and ZIKV (163 nts) RNA are right below the 200 nts DNA ladder in the Urea-PAGEs. The DNA ladder does not provide an analytical measurement of exactly where the RNA should be relative to the ladder but gives a comparable location to ensure that the RNA is pure and is close to its respective length.
